# Supplementary material for: Childhood Brain Tumors: A Review of Strategies to Translate CNS Drug Delivery to Clinical Trials
Source: MDPI journal article supplement (doi:10.3390/cancers15030857), 2023-01-30
Supplement: s1 [file s1]

## Supplementary Material

**Table S1:** Summary of childhood brain tumor characteristics

| Image/Presentation                                                                                                                                                        | Histological/Molecular/Anatomy                                                                                                                       | Treatments                                                                                                                       | Outcomes, toxicities, survival and late consequences                                                                                                      |
|---------------------------------------------------------------------------------------------------------------------------------------------------------------------------|------------------------------------------------------------------------------------------------------------------------------------------------------|----------------------------------------------------------------------------------------------------------------------------------|-----------------------------------------------------------------------------------------------------------------------------------------------------------|
| Medulloblastoma commonest malignant brain tumor in childhood.                                                                                                             | Medulloblastoma (15%)<br>Anatomy: Cerebellar                                                                                                         | Surgery: Tissue sampling, primary tumor resection, management of raised ICP.                                                     | Cerebellar mutism – slowed global processing speed and ataxia.                                                                                            |
| Presentation: raised intra-cranial pressure, 6 <sup>th</sup> nerve palsy, weight loss, head tilt, neck pain, ataxia, cognitive decline.                                   | Staging: Localized versus metastatic<br><12 bio-characterization categories, now driving new trials.                                                 | CT: Adjuvant therapy in routine use enhancing survival rates.<br><br>RT: Cranio-Spinal.<br><br>Survival: 40-80% 5 year survival. | Bone marrow toxicity, ototoxicity, renal toxicity.<br><br>Somnolence syndrome, late cognitive impairment, endocrine impairment of growth and development. |
| Diffuse Midline Glioma (DMG)                                                                                                                                              | Astrocytoma predominantly grade 3 & 4 (10-15%)                                                                                                       | Surgery: Biopsy and management of raised ICP.                                                                                    | Local bleeding causing focal neurology, somnolence syndrome.                                                                                              |
| Presentation: Progressive onset of difficulties with swallowing/choking, squint, facial palsy, head tilt or neck pain, headache, vomiting, motor weakness, unsteady gait. | Anatomy: Midline structures, brainstem midbrain and thalamus.<br><br>H3 Histone mutations affecting 80%, BRAF v600E 8-10% MEK 2/1 pathway mutations. | RT: Involved field.<br><br>CT: No drug therapy effective.<br><br>Survival rates: <20% survival at 2 years.                       | Progressive brainstem failure leading to death.                                                                                                           |

|                                                                                                                                                              |                                                                                                                                                                                                              |                                                                                                                                                                                                                                                                                                                                                                                                                                                                                                                                                                                                                                                                                                                                                                                                                |                                                                                                                                                                                                                                                                                           |
|--------------------------------------------------------------------------------------------------------------------------------------------------------------|--------------------------------------------------------------------------------------------------------------------------------------------------------------------------------------------------------------|----------------------------------------------------------------------------------------------------------------------------------------------------------------------------------------------------------------------------------------------------------------------------------------------------------------------------------------------------------------------------------------------------------------------------------------------------------------------------------------------------------------------------------------------------------------------------------------------------------------------------------------------------------------------------------------------------------------------------------------------------------------------------------------------------------------|-------------------------------------------------------------------------------------------------------------------------------------------------------------------------------------------------------------------------------------------------------------------------------------------|
| Low Grade Glioma                                                                                                                                             | Pilocytic astrocytoma grade 1 (<40%)<br>>70% associated with MAP kinase pathway mutations.                                                                                                                   | Surgery: Primary surgery where safe and if complete sole therapy, tissue sampling and management of raised ICP.                                                                                                                                                                                                                                                                                                                                                                                                                                                                                                                                                                                                                                                                                                | Focal neurological risks of surgery and tumor effects.                                                                                                                                                                                                                                    |
| Presentation: Association with NF1, progressive visual symptoms, endocrine deficiencies (growth disturbance), gait unsteadiness with headaches and vomiting. | Ganglioglioma, PXA both associated with BRAF V600E mutations. 1/3 hypothalamic, 1/3 cerebellar remainder can occur in any brain region.<br><br>Strong association with NF1 (OPG), Tuberous Sclerosis (SEGA). | CT: Carboplatin and vincristine 1 <sup>st</sup> line, vinblastine 2 <sup>nd</sup> line, bevacizumab 3 <sup>rd</sup> line for critical neurological deterioration, i.e. vision loss.<br><br>RT: Limited role in persistently progressive and chemo-resistant tumor.<br><br>Survival: resectable >90% 5 years<br>unresectable tumors ~50% at 5 years. OS: Overall >90% at 10 years                                                                                                                                                                                                                                                                                                                                                                                                                               | Bone marrow toxicity, hypersensitivity, neurotoxicity. Local hemorrhage, hypertension.<br><br>Local radiation damage to brain structures and vascularity.<br><br>Focal injuries related to tumor and its treatment.                                                                       |
| Ependymoma                                                                                                                                                   | Histology: Immunohistochemical and genomic markers identifying 9 subgroups in posterior fossa (PF), supratentorial (ST) and spinal locations.                                                                | Surgery: Primary surgery for tissue sampling, debulking and management of raised ICP. Where surgery is complete it can be curative in certain subtypes – see below. Posterior fossa tumors are often intimately involved in brainstem structures. Supratentorial tumors whilst often large are amenable to extensive debulking, 50% of cases result in incomplete surgical resection.<br><br>RT: Offered to those with incomplete resection and can be deferred until the child is older or if the field is to be extensive.<br><br>CT: Trials are in progress to identify effective agents.<br><br>Prognosis is determined by molecular/anatomical subtypes with ST Yap and PF EPN-B having the best outcomes (>90% 5 year survival) and ST RELA and PF EPN-A having poorer prognosis (~50% 5-year survival). | Focal neurological injury from multiple surgeries. PF tumors in particular can lead to bulbar palsies need for tracheostomy.<br><br>RT can lead to growth failure, endocrine and cognitive damage when used in early life.<br><br>Spinal cord tumors threaten para-paresis and paralysis. |

|                                                                                                                                                                                                                                                            |                                                                                                                                                                                                                                       |                                                                                                                                                                                                                                                                                                                                                                                                                                                                                                                        |                                                                                                                                                                                                                                                |
|------------------------------------------------------------------------------------------------------------------------------------------------------------------------------------------------------------------------------------------------------------|---------------------------------------------------------------------------------------------------------------------------------------------------------------------------------------------------------------------------------------|------------------------------------------------------------------------------------------------------------------------------------------------------------------------------------------------------------------------------------------------------------------------------------------------------------------------------------------------------------------------------------------------------------------------------------------------------------------------------------------------------------------------|------------------------------------------------------------------------------------------------------------------------------------------------------------------------------------------------------------------------------------------------|
| <p>Atypical Teratoid Rhabdoid Tumor (ATRT)</p> <p>Presentation: Infancy with disturbance of development, accelerated head growth, symptoms of raised ICP and focal neurology, can arise in posterior fossa or supratentorial region metastasis common.</p> | <p>Histology: Requires INI mutation and identification of SMARCB1 and 4 mutations. EZH and SNF5 are also associated.</p>                                                                                                              | <p>Surgery: for tissue sampling and management of raised ICP. CSF sampling and neuraxis imaging required to identify metastasis which are common at diagnosis and present on therapy.</p> <p>RT: Used in older patients and contributes to disease control.</p> <p>CT: Intensified combined chemotherapy with sarcoma-like protocols show promise. Intrathecal therapy is in use to control metastasis. Loss of dose intensity can result in disease recurrence. New biotargets are under investigation in trials.</p> | <p>Survival occurs in fewer than 50%. Intensified CT can lead to hearing, renal, cardiac and bone marrow toxicities.</p> <p>Irradiation to the developing brain in early life can lead to global brain injury and inevitable consequences.</p> |
| <p>Embryonal tumor with multilayered rosettes (ETMR).</p> <p>Rapidly developing tumors most common in infancy and early childhood. Presenting with rapid head growth developmental delay, symptoms of raised ICP and progressive neurology.</p>            | <p>Previously referred to as supratentorial PNET/high grade glioma in childhood. Now recognized in new category characterized by amplification at 19q13.42 associated functionally with diffuse expression of the LIN28A protein.</p> | <p>Surgery: Tissues sampling, debulking and management of raised ICP.</p> <p>RT: Irradiation of primary and metastatic disease.</p> <p>CT: Intensified approaches of multimodal therapy has produced improved survival. Molecular characteristics are yet to be tested in clinical trials.</p>                                                                                                                                                                                                                         | <p>Survival occurs in fewer than 50%. Intensified CT can lead to hearing, renal, cardiac and bone marrow toxicities.</p> <p>Irradiation to the developing brain in early life can lead to global brain injury and inevitable consequences.</p> |

Abbreviations: PFS, progression free survival; OS, overall survival; ICP, intercranial pressure; CT, chemotherapy; RT, Radiotherapy; CSF, cerebrospinal fluid.

**Table S2:** Current neuro-interventional clinical trials in intra-arterial chemotherapy

| Indication                       | IA Agent(s)            | NCT Number  | Timeline and Enrolment Status                              |
|----------------------------------|------------------------|-------------|------------------------------------------------------------|
| <b>Ocular Retinoblastoma</b>     | Multiple               | NCT00901238 | 2009-2010 Completed                                        |
| <b>Ocular Retinoblastoma</b>     | Multiple               | NCT03267459 | 2018-2025 Recruiting                                       |
| <b>Ocular Retinoblastoma</b>     | Melphalan              | NCT01393769 | 2011-2016 Terminated (low enrolment in rare disease)       |
| <b>Ocular Retinoblastoma</b>     | Melphalan              | NCT01293539 | 2011-2017 Terminated (IAC now considered standard of care) |
| <b>Diffuse Intrinsic Pontine</b> | Melphalan              | NCT01688401 | 2012-2017 Suspended (interim review)                       |
| <b>Glioma</b>                    |                        |             |                                                            |
| <b>Ocular Retinoblastoma</b>     | Not Specified          | NCT01151748 | 2010-2012 Withdrawn (IND agreement not reached)            |
| <b>Ocular Retinoblastoma</b>     | Multiple               | NCT02955524 | 2016-2020 Not yet recruiting                               |
| <b>Ocular Retinoblastoma</b>     | Melphalan              | NCT00906113 | 2011-2017 Recruiting                                       |
| <b>Ocular Retinoblastoma</b>     | Melphalan              | NCT02097134 | 2014-2018 Active, not recruiting                           |
| <b>Ocular Retinoblastoma</b>     | Melphalan, Carboplatin | NCT00857519 | 2009-2016 Completed                                        |
| <b>Ocular Retinoblastoma</b>     | Multiple               | NCT03450590 | 2018-2019 Active, not yet recruiting                       |
| <b>Ocular Retinoblastoma</b>     | Multiple               | NCT02866136 | 2016-2027 Recruiting                                       |
| <b>Ocular Retinoblastoma</b>     | Multiple               | NCT02116959 | 2014-2019 Active, not recruiting                           |
| <b>Brain Metastases</b>          | Carboplatin            | NCT00362817 | 2004-2008 Completed                                        |
| <b>Malignant Glioma</b>          | Carboplatin            | NCT00075387 | 2003-2021 Recruiting                                       |

|                                          |                                             |             |                                                                            |
|------------------------------------------|---------------------------------------------|-------------|----------------------------------------------------------------------------|
| <b>Malignant Glioma</b>                  | ADV-TK Adenovirus                           | NCT00870181 | 2008-2012 Completed                                                        |
| <b>Malignant Glioma</b>                  | Cetuximab (BBBD with Mannitol)              | NCT02861898 | 2016-2019 Recruiting                                                       |
| <b>Malignant Glioma</b>                  | Melphalan (BBBD with Mannitol)              | NCT00253721 | 1998-2016 Terminated (Other competing clinical trials affecting enrolment) |
| <b>Malignant Glioma</b>                  | Cetuximab (BBBD with Mannitol)              | NCT02800486 | 2016-2021 Recruiting                                                       |
| <b>Malignant Glioma</b>                  | Bevacizumab                                 | NCT02285959 | 2014-2020 Recruiting                                                       |
| <b>Malignant Glioma</b>                  | Temozolomide                                | NCT01180816 | 2010-2018 Active, not recruiting                                           |
| <b>Malignant Glioma</b>                  | Bevacizumab                                 | NCT00968240 | 2009-2014 Completed                                                        |
| <b>Malignant Glioma</b>                  | Cetuximab (BBBD with Mannitol)              | NCT01238237 | 2009-2016 Completed                                                        |
| <b>Breast Cancer Brain Metastases</b>    | Trastuzumab                                 | NCT02571530 | 2015-2020 Recruiting                                                       |
| <b>Glioma</b>                            | Cetuximab, Bevacizumab                      | NCT01884740 | 2013-2019 Recruiting                                                       |
| <b>Malignant Glioma</b>                  | Bevacizumab                                 | NCT01811498 | 2013-2020 Recruiting                                                       |
| <b>Malignant Glioma</b>                  | Bevacizumab, Carboplatin                    | NCT01386710 | 2011-2020 Suspended (PI transferring to new institution)                   |
| <b>Malignant Glioma</b>                  | Bevacizumab                                 | NCT01269853 | 2010-2018 Recruiting                                                       |
| <b>Vestibular Schwannoma</b>             | Bevacizumab                                 | NCT01083966 | 2011-2020 Suspended (PI transferring to new institution)                   |
| <b>CNS Embryonal or Germ Cell Tumors</b> | Melphalan, Carboplatin (BBBD with Mannitol) | NCT00983398 | 2009-2020 Recruiting                                                       |

(Table S2 reprinted with permission under a Elsevier and Copyright Clearance Center License; License No. 5472700032068

**Table S3:** Published clinical trials and clinical reports of CED in high grade glioma

| <b>Trial design/number of patients</b>         | <b>Patient group</b>                | <b>Infused drug</b>            | <b>Catheter used</b>                    | <b>Outcome</b>                                                                   |
|------------------------------------------------|-------------------------------------|--------------------------------|-----------------------------------------|----------------------------------------------------------------------------------|
| Phase I concentration escalation (18 patients) | Adults. Recurrent malignant glioma  | Transferrin-CRM107             | Sialastic peritoneal CSF shunt catheter | Local toxicity > 1µg/mL<br><br>Local disease regression in 2 patients            |
| Phase I feasibility (9 patients)               | Adults: recurrent high grade glioma | IL-4 Pseudomonas exotoxin      | CSF shunt catheter                      | Local tumor necrosis requiring craniotomy in 6/9 patients. 1 long term survivor. |
| Phase I concentration escalation (31 patients) | Adults: recurrent high grade glioma | IL-4 Pseudomonas exotoxin      | CSF shunt catheter                      | Maximum tolerated dose 6 µg/mL. Median survival 8.2 months                       |
| Phase I feasibility (8 patients)               | Adults: High grade glioma           | HSV-1- <i>tk</i> gene liposome | CSF shunt catheter                      | Feasibility study                                                                |

|                          |                                                                  |                                              |                     |                                                                                                              |
|--------------------------|------------------------------------------------------------------|----------------------------------------------|---------------------|--------------------------------------------------------------------------------------------------------------|
| Phase I/II (15 patients) | Adults: recurrent<br>high grade glioma                           | Paclitaxel                                   | CSF shunt catheter  | 40% infusions caused toxicity.<br><br>13% severe infection rate.<br><br>Suggestion of efficacy in 2 patients |
| Phase I/II (52 patients) | Adults: newly<br>diagnosed and<br>recurrent high<br>grade glioma | Cotara ( <sup>131</sup> I-chTNT-<br>1/B MAb) | CSF shunt catheter  | 25% procedural complications.<br><br>Median survival 37 weeks<br>(recurrent glioblastoma patients).          |
| Phase I (51 patients)    | Adults: recurrent<br>high grade glioma                           | IL-13 pseudo toxin<br>(IL13-PE38QQR)         | CSF shunt catheter. | Maximum tolerated concentration<br><br>0.5 µg/mL. No distribution<br>analysis                                |
| Phase I (22 patients)    | Adults: recurrent<br>high grade glioma                           | IL13-PE38QQR                                 | CSF shunt catheter. | Maximum tolerated concentration<br><br>0.5 µg/mL. No distribution<br>analysis                                |
| Phase I (20 patients)    | Adults: recurrent<br>high grade glioma                           | TP-38.<br>(pseudomonas                       | CSF shunt catheter. | Maximum tolerated dose<br><br>100ng/mL Poor drug distribution<br>with reflux into CSF spaces.                |

|                                                               |                                        |                                                             |                                                                        |                                                                                   |
|---------------------------------------------------------------|----------------------------------------|-------------------------------------------------------------|------------------------------------------------------------------------|-----------------------------------------------------------------------------------|
| exotoxin bound to                                             |                                        |                                                             |                                                                        |                                                                                   |
| TGF $\alpha$ )                                                |                                        |                                                             |                                                                        |                                                                                   |
| Phase III vs Gliadel wafers<br>(276 patients, 183 in CED arm) | Adults. Recurrent<br>high grade glioma | IL13-PE38QQR                                                | CSF shunt catheter.                                                    | Poor drug distribution. No<br>survival benefit demonstrated                       |
| Randomized phase IIb (145<br>patients)                        | Adults. Recurrent<br>high grade glioma | Trabedersen (TGF $\beta$ 2<br>antisense<br>oligonucleotide) | External ventricular drain<br>connected to a subcutaneous<br>reservoir | No effect – poor trial design. No<br>distribution analysis.                       |
| Phase Ib. (16 patients)                                       | Adults: recurrent<br>high grade glioma | Topotecan                                                   | External ventricular drain                                             | Maximum tolerated dose<br>0.1mg/mL. Suggestion of efficacy<br>in 4 of 16 patients |
| Case report                                                   | Pediatric DMG                          | Topotecan                                                   | External ventricular drain                                             | Survival not enhanced. Proof of<br>concept. No toxicity.                          |
| Case report (1 patient)                                       | Pediatric: DMG                         | Carboplatin                                                 | Fused silica recessed step<br>catheter                                 | Large volume infusion well<br>tolerated.                                          |

|                                                    |                                  |                                                                        |                                                                                                                              |                                                                                                    |
|----------------------------------------------------|----------------------------------|------------------------------------------------------------------------|------------------------------------------------------------------------------------------------------------------------------|----------------------------------------------------------------------------------------------------|
| Case report (1 patient)                            | Adult: recurrent<br>Glioblastoma | Carboplatin                                                            | Carbothane recessed step<br>catheter with transcutaneous<br>port                                                             | Procedure and infusions tolerated.<br>3 cycles administered.                                       |
| Phase I dose escalation (28<br>patients)           | Pediatric DMG                    | [ <sup>124</sup> I]-8H9<br>radiolabelled<br>antibody against B7-<br>H3 | SmartFlow cannula (MRI<br>Interventions, Irvine, CA,<br>USA) or SmartFlow Flex<br>catheter (Brainlab AG,<br>Munich, Germany) | No treatment related grade 4<br>toxicity. Procedure well tolerated                                 |
| Phase 1 dose escalation (20<br>patients)           | Adult: recurrent<br>Glioblastoma | Delta24-RGD (DNX-<br>2401) oncolytic<br>adenovirus                     | Not specified                                                                                                                | Self-limiting toxicity due to local<br>inflammation                                                |
| Single-centre, open-label,<br>single-arm, phase 1b | Adult: recurrent<br>Glioblastoma | Topotecan                                                              | Chronic infusion using<br>Synchromed (Medtronic)<br>subcutaneous pump                                                        | Chronic CED of topotecan is a<br>potentially safe and active therapy<br>for recurrent glioblastoma |

|                                                 |                |                                     |                                                                                              |                                                                                                          |
|-------------------------------------------------|----------------|-------------------------------------|----------------------------------------------------------------------------------------------|----------------------------------------------------------------------------------------------------------|
|                                                 |                |                                     | 1.5-mm outer diameter silastic                                                               |                                                                                                          |
|                                                 |                |                                     | Spetzler lumbar shunt                                                                        |                                                                                                          |
|                                                 |                |                                     | catheter                                                                                     |                                                                                                          |
| Compassionate treatment<br>program (8 patients) | Pediatric: DMG | Carboplatin and<br>Sodium Valproate | Carbothane recessed step<br>catheters with transcutaneous<br>port (Renishaw<br>NeuroInfuse™) | Side-effects during brainstem<br>infusion are common, can be<br>transient or persist longer than<br>24h. |

**Table S4:** Drug mechanism references and databases

| Website                             | Address                                                                       |
|-------------------------------------|-------------------------------------------------------------------------------|
| Drug central online drug compendium | <a href="http://drugcentral.org/">http://drugcentral.org/</a>                 |
| Drugbank                            | <a href="https://www.drugbank.ca/">https://www.drugbank.ca/</a>               |
| Clue drug repurposing hub           | <a href="https://clue.io/repurposing-app">https://clue.io/repurposing-app</a> |

**Table S5:** Approved drugs used in pediatric drug screening

| <b>Drug/Disease Model</b>  | <b>Mode of Action/Target</b>               | <b>Therapeutic Class</b>          | <b>Sensitivity</b> |
|----------------------------|--------------------------------------------|-----------------------------------|--------------------|
| Resveratrol                | Cytochrome P450, SIRT                      | Antioxidant                       |                    |
| 3'-Azido-3'-deoxythymidine | Nucleoside reverse transcriptase Inhibitor | Antiretroviral                    |                    |
| 5-aza-cytidine             | DNA methyltransferase inhibitor            | Antineoplastic                    |                    |
| 5-Fluorouracil             | DNA synthesis inhibitors                   | Antineoplastic                    |                    |
| Actinomycin D              | RNA synthesis inhibitor                    | Antibiotic/Antineoplastic         | ETMR, MB           |
| Albendazole                | Tubulin inhibitor                          | Anthelmintic                      |                    |
| Alfuzosin                  | Receptor agonist/antagonist                | Antineoplastic                    |                    |
| Amsacrine                  | DNA topoisomerase inhibitor                | Antineoplastic                    | MB                 |
| AN2728                     | PDE4 inhibitor                             | Anti-inflammatory                 |                    |
| Ancitabine Hydrochloride   | Antineoplastic                             | Antineoplastic                    | MB                 |
| Arsenic trioxide           | DNA fragmentation                          | Antineoplastic                    |                    |
| Artemether                 | ATP1A1                                     | Anti-malarial                     |                    |
| Artenimol                  | ENO1 and FLNA                              | Anti-malarial                     |                    |
| Artesunate                 | DNA synthesis inhibitors                   | Anti-malarial                     |                    |
| Atorvastatin               | HMG-CoA Reductase Inhibitors               | Statin                            |                    |
| Auranofin                  | Other                                      | Anti-inflammatory                 |                    |
| Axitinib                   | RTK inhibitor                              | Antineoplastic                    |                    |
| Azacitidine                | DNA methyltransferase inhibitor            | Antineoplastic                    |                    |
| Azacytidine                | DNA methyltransferase inhibitor            | Antineoplastic                    |                    |
| Azathioprine               | DNA synthesis inhibitor                    | Immunosuppressant /antineoplastic |                    |
| AZD 2281 (Olaparib)        | PARP inhibitor                             | Antineoplastic                    |                    |
| BCNU*                      | DNA alkylating agent                       | Antineoplastic                    | HGG                |
| Benzalkonium Chloride      | Cationic surfactant                        | Antibacterial/antifungal          |                    |
| Bexarotene                 | RXR activator                              | Antineoplastic                    |                    |
| BIBW 2992 (Afatinib)       | RTK inhibitor                              | Antineoplastic                    |                    |
| Bicalutamide               | Androgen receptor inhibitor                | Anti-androgen                     |                    |
| Bortezomib                 | 26S proteasome                             | Antineoplastic                    | ETMR, HGG          |
| Bosutinib                  | Tyrosine kinase inhibitor                  | Anti-neoplastic                   |                    |
| Cabozantinib               | Tyrosine kinase inhibitor                  | Antineoplastic                    |                    |
| Cantharidin                | Phosphatase inhibitor                      | Antineoplastic                    |                    |
| Capecitabine               | Nucleic acid synthesis inhibitor           | Antineoplastic                    |                    |
| Carboplatin                | DNA cross linking agent                    | Antineoplastic                    | HGG                |
| Carfilzomib                | Proteasome inhibitor                       | Antineoplastic                    | HGG                |
| Cerivastatin Na            | HMG-CoA Reductase Inhibitors               | Statin                            |                    |
| Cetylpyridinium Chloride   | CASP2 inhibitor                            | Antibacterial/antifungal          |                    |

|                              |                                               |                                      |                  |
|------------------------------|-----------------------------------------------|--------------------------------------|------------------|
| Ciclopirox Olamine           | Protein synthesis inhibitor                   | Antibacterial/antifungal             |                  |
| Cisplatin                    | Alkylating agent                              | Antineoplastic                       |                  |
| Colchicine                   | Microtubule assembly                          | Anti-inflammatory                    |                  |
| CP-690550 (Tofacitinib)      | JAK3 inhibitor                                | Antirheumatic                        |                  |
| Crizotinib                   | Receptor tyrosine kinase inhibitor            | Antineoplastic                       | HGG              |
| Curcumin                     | PPAR $\gamma$ , vit D3 receptor               | Anti-neoplastic                      |                  |
| Cyclophosphamide             | Alkylating agent                              | Immunosuppressant<br>/antineoplastic |                  |
| Cyclosporin A                | Phosphatase inhibitor                         | Immunosuppressant                    |                  |
| Cytarabine                   | DNA synthesis inhibitors                      | Antiviral/antineoplastic             | MB               |
| Dasitinib                    | BCR/ABL, c-Kit, Src, Ephrin                   | Antineoplastic                       | HGG              |
| Daunorubicin                 | Topoisomerase inhibitor                       | Antineoplastic                       | ETMR             |
| Decitabine                   | Inhibits methyltransferases                   | Antineoplastic                       |                  |
| Dequalinium chloride hydrate | Bacterial permeability inducer                | Antibacterial                        |                  |
| Docetaxel                    | Microtubule assembly                          | Antineoplastic                       | ETMR             |
| Doxorubicin                  | Topoisomerase inhibitor                       | Antineoplastic                       | ETMR, MB,<br>HGG |
| Epirubicin Hydrochloride     | DNA synthesis inhibitors                      | Antineoplastic                       |                  |
| Eribulin                     | Microtubule inhibitor                         | Antineoplastic                       | HGG              |
| Erlotinib                    | Protein kinase inhibitor                      | Antineoplastic                       |                  |
| Etoposide                    | Topoisomerase inhibitor                       | Antineoplastic                       | ETMR, MB,<br>HGG |
| Everolimus                   | mTOR inhibitor                                | Immunosuppressant<br>/Antineoplastic |                  |
| FK-506                       | FKBP-12 binding protein                       | Immunosuppressant                    |                  |
| Fluphenazine dihydrochloride | Dopamine receptor antagonist                  | Antipsychotic                        |                  |
| Fostamatinib                 | SYK inhibitor                                 | Anti-inflammatory                    | HGG              |
| FTY720 HCl                   | Sphingosine 1-phosphate receptor<br>modulator | Immunosuppressant                    |                  |
| Gefitinib                    | RTK inhibitor                                 | Antineoplastic                       |                  |
| Gemcitabine HCl              | Nucleic acid synthesis inhibitor              | Antineoplastic                       | ETMR             |
| Gentian Violet               | DNA binding                                   | Antibacterial/antifungal             |                  |
| Gramicidin                   | Bacterial permeability inducer                | Antibacterial/antifungal             |                  |
| Homoharringtonine            | DNA synthesis inhibitors                      | Antineoplastic                       |                  |
| Idarubicin hydrochloride     | Topoisomerase inhibitor                       | Antibacterial<br>/antineoplastic     | MB               |
| Ifosfamide                   | Alkylating agent                              | Immunosuppressant<br>/antineoplastic |                  |
| Imatinib                     | Tyrosine kinase inhibitor                     | Antineoplastic                       |                  |
| Irinotecan                   | Topoisomerase inhibitor                       | Antineoplastic                       |                  |
| Itavastatin                  | HMG-CoA reductase inhibitors                  | Statin                               | MB               |
| Itraconazole                 | Cytochrome P450                               | Antifungal                           |                  |
| Lapatinib                    | EGFR-ErbB-2 inhibitor                         | Antineoplastic                       |                  |

|                                |                                                     |                                      |           |
|--------------------------------|-----------------------------------------------------|--------------------------------------|-----------|
| Maraviroc                      | CCR5 antagonist                                     | Antiretroviral                       |           |
| Mechlorethamine                | DNA synthesis inhibitors                            | Antineoplastic                       |           |
| Melphalan                      | Alkylating agent                                    | Antineoplastic                       | HGG       |
| Mercaptopurine                 | Methyltransferase inhibitors                        | Antineoplastic                       |           |
| Methotrexate                   | Nucleic acid synthesis inhibitor                    | Immunosuppressant<br>/antineoplastic |           |
| Mitoxantrone                   | Topoisomerase inhibitor                             | Antineoplastic                       | HGG       |
| Montelukast sodium             | LTR antagonist                                      | Anti-asthmatic                       |           |
| Mycophenolic Acid              | IMPDH reversible inhibitor                          | Immunosuppressant<br>/antineoplastic | MB        |
| N-acetyl cysteine              | SODM, VEGFRA, CYC                                   | Mucolytic agent/antidote             |           |
| Nicotinamide                   | SIR3, SIR2, SIR5, SIR1, HCAR2,<br>HCAR3, NADC, NNMT | Anti-inflammatory                    |           |
| Nilotinib                      | BCR-ABL kinase inhibitor                            | Antineoplastic                       |           |
| Olaparib                       | PARP inhibitor                                      | Antineoplastic                       | HGG       |
| Paclitaxel                     | Microtubule inhibitor                               | Antineoplastic                       | ETMR      |
| Panobinostat                   | HDAC inhibitor                                      | Antineoplastic                       | ETMR, HGG |
| Pazopanib                      | tyrosine kinase inhibitor                           | Antineoplastic                       |           |
| PD0332991                      | CDK inhibitor                                       | antineoplastic                       |           |
| Pemetrexed Disodium            | Nucleic acid synthesis inhibitor                    | Antineoplastic                       |           |
| Podophyllotoxin                | Microtubule assembly                                | Antiviral                            |           |
| Ponatinib                      | pan-Bcr-Abl inhibitor                               | Antineoplastic                       |           |
| Prednisone                     | GCR, S28A1, ANXA1                                   | Anti-inflammatory                    |           |
| Procarbazine                   | Alkylating agent                                    | Antineoplastic                       |           |
| Pyrrithione Zinc               | Other                                               | Antibacterial/antifungal             |           |
| Quinacrine                     | Phospholipase A2 inhibitor                          | Antihelminthic                       |           |
| Raltegravir                    | HIV integrase inhibitor                             | Antiretroviral                       |           |
| Raltitrexed                    | DNA synthesis inhibitors                            | Antineoplastic                       |           |
| Rapamycin                      | mTOR inhibitor                                      | Antifungal,<br>Immunosuppressant     |           |
| Repaglinide                    | Other                                               | Antihyperglycemic                    |           |
| Retinoic acid p-hydroxyanilide | Other                                               | Antineoplastic                       |           |
| Revlimid                       | CRBN and TNFA                                       | Antineoplastic                       |           |
| Rofecoxib                      | COX-2 inhibitor                                     | Anti-inflammatory                    |           |
| Ruxolitinib                    | Kinase inhibitor                                    | Antineoplastic                       |           |
| Simvastatin                    | HMG-CoA reductase inhibitors                        | Statin                               |           |
| Sodium aurothiomalate          | AA3R, EGFR, FYN, TRXR1                              | Anti-inflammatory                    |           |
| Sorafenib                      | Raf, PDGFR, VEGFR, c-Kit                            | Antineoplastic                       | HGG       |
| Sparglumic Acid                | Mast cell stabilizer                                | Neurotransmitter                     |           |
| Sunitinib                      | VEGFR2 and PDGFR (tyrosine kinase<br>inhibitor)     | Antineoplastic                       |           |
| Tamoxifen                      | Estrogen receptor modulator                         | Antineoplastic                       |           |

|                         |                            |                                      |      |
|-------------------------|----------------------------|--------------------------------------|------|
| Temozolomide*           | Alkylating agent           | Antineoplastic                       |      |
| Temsirolimus            | mTOR inhibitor             | Immunosuppressant<br>/antineoplastic |      |
| Thioguanine             | DNA synthesis inhibitors   | Antineoplastic                       |      |
| Thiotepa                | Alkylating agent           | Immunosuppressant<br>/antineoplastic | HGG  |
| Topotecan               | Topoisomerase inhibitor    | Antineoplastic                       | ETMR |
| Tretinoin               | Retinoid receptor agonist  | Antineoplastic                       |      |
| Triamcinolone diacetate | lysyl oxidase antagonist   | Anti-inflammatory                    |      |
| Valproic acid           | GSK, GABA, HDAC inhibitor  | Antiepileptic                        |      |
| Vandetanib              | EGFR, VEGR, Ret            | Antineoplastic                       | HGG  |
| Veliparib               | PARP inhibitor             | Antineoplastic                       |      |
| Vemurafenib             | RAF inhibitor              | Antineoplastic                       |      |
| Vincristine             | Microtubule inhibitor      | Antineoplastic                       | ETMR |
| Vindesine Sulfate       | Microtubule assembly       | Antineoplastic                       |      |
| Vinorelbine Bitartrate  | Microtubule assembly       | Antineoplastic                       |      |
| Vismodegib              | Hedgehog pathway inhibitor | Antineoplastic                       |      |
| Vorinostat              | HDAC inhibitor             | Antineoplastic                       | HGG  |
|                         |                            |                                      |      |

**Table S6:** Drugs graded by eligibility for trial by intrathecal administration for medulloblastoma.

|                                                                    |                                                                                                                                                    |
|--------------------------------------------------------------------|----------------------------------------------------------------------------------------------------------------------------------------------------|
| <b>Agents in trial</b>                                             | <p>Liposomal cytarabine (Depocyte), withdrawn from production by manufacturer</p> <p>Mafofamide, withdrawn from production by manufacturer</p>     |
| <b>Agents suitable for clinical trial</b>                          | <p>Carboplatin</p> <p>Etoposide</p> <p>Nimustine hydrochloride</p>                                                                                 |
| <b>Drugs requiring further investigation before clinical trial</b> | <p>Floxuridine</p> <p>4-hydroperoxy-cyclophosphamide</p>                                                                                           |
| <b>Drugs requiring further investigation (low priority)</b>        | <p>Diaziquone</p> <p>Mercaptopurine</p> <p>Rubitecan</p> <p>Topotecan</p> <p>Radioimmunotherapy <sup>131</sup>I-3F8 murine monoclonal antibody</p> |
| <b>Drugs with insufficient information to grade</b>                | <p>Temozolomide</p>                                                                                                                                |
